# Supplementary material for: The relationship between ESG and firm value. Case study of the automotive industry
Source: Frontiers journal article supplement (doi:10.3389/fenvs.2022.1059906), 2022-12-30
Supplement: Table_3.XLSX [file Table_3.XLSX]

## Sheet: Data
EntityId	EntityName	Country	Region	FV_2015	ESG_Score_2015	E_Score_2015	S_Score_2015	G_Score_2015	FV_2016	ESG_Score_2016	E_Score_2016	S_Score_2016	G_Score_2016	FV_2017	ESG_Score_2017	E_Score_2017	S_Score_2017	G_Score_2017	FV_2018	ESG_Score_2018	E_Score_2018	S_Score_2018	G_Score_2018	FV_2019	ESG_Score_2019	E_Score_2019	S_Score_2019	G_Score_2019	FV_2020	ESG_Score_2020	E_Score_2020	S_Score_2020	G_Score_2020
1008235051	CarMax Inc.	United States	North America	196436	53	42	51	70	242096	50.37	43.64	42.32	72.65	243165	50.37	43.64	42.32	72.65	245733	47.59	44.5	43.2	58.95	297271	47.85	43.79	44.03	59.65	346273	51.11	42.78	45.51	71.75
1008752898	Tata Motors Ltd.	India	Asia / Pacific	295307	67	68	57	77	350746	63.48	66.44	40.63	85.58	295875	61.05	65.045	47.67	77.55	232492	64.18	67.22	51.67	73.7	196871	67.59	71.56	53.46	77.4	340250	68.83	71.805	58.72	75.6
1013453658	BYD Company Ltd.	China	Asia / Pacific	124853	56	55	53	63	157630	59.46	60.78	53.41	63	191836	59.6	60.78	53.76	64.5	193058	64.05	65.56	64.95	60.25	157544	62.66	63.22	62.92	61.35	322570	62.82	65.65	62.92	55.05
1008756950	DSV A/S	Denmark	Europe	57029.1	66	62	67	68	83314.1	64.375	61.525	65.91	65.9	120991	58.18	48.85	60.83	67	146659	57.58	44.64	61.39	67.1	195495	60.46	53.11	62.3	68.55	304849	62.23	58.84	60.62	70.12
1008545397	Suzuki Motor Corp.	Japan	Asia / Pacific	179428	51.5	54	47	51	262330	46.975	54.48	39.18	44.1	320411	48.41	53.57	42.5	42.9	252121	51.85	57.56	50.09	43.7	156965	52.06	58.02	50.09	43.7	294064	58.1	67.3	57.55	42.2
1012741914	Maruti Suzuki India Ltd.	India	Asia / Pacific	169801	61	64	49	71	280965	61.42	66.33	45.7	71.45	411299	64.39	73.33	47.6	68.45	291656	62.715	70.78	47.6	65.45	172202	65.58	70.78	49.38	73.25	284047	66.66	73.81	49.38	74.5
1008164126	Magna International, Inc.	Canada	North America	197975	63	64	60	66	239161	66.14	73.29	58.77	69	195841	66.51	72.71	58.57	69.75	197947	66.86	75.46	59.32	66.99	252856	66.63	75.46	59.25	66.09	283575	67.46	71.07	65.2	65.69
1017713226	Geely Automobile Holdings Ltd.	Hong Kong	Asia / Pacific	88116.9	44	33	47	62	313158	44.22	33.33	43.23	65	163245	44.25	33.33	43.33	65	185390	51.83	49.22	47.73	61.45	341622	55.32	53.22	54.87	59.65	280826	62.19	68.17	49.52	66.65
1008760153	Transurban Group	Australia	Asia / Pacific	134113	61	58	57.5	71.5	173283	57.575	49.335	52.74	77.49	190206	65.62	55.87	64.2	77.49	193457	65.62	60.26	64.135	75.39	269039	66.78	69.35	57.24	78.45	272283	67.85	69.43	56.34	84.05
1008172967	PACCAR Inc.	United States	North America	209029	58	61	54	58	198789	55.4	56.43	50.545	60.49	239310	55.01	60.87	44.38	60.49	227746	52.74	58.64	42.51	57.55	246135	53.045	59.65	42.945	56.45	269753	51.96	58.98	40.71	56.45
1008756648	Mahindra & Mahindra Ltd.	India	Asia / Pacific	176224	74	68	73	77	198443	73.75	71.88	77.23	74.95	220376	73.39	69.89	77.33	74.95	218014	75.155	72.22	71.38	84.96	154682	75.145	72.22	71.28	85.06	240011	73.44	71.05	69.55	82.41
1106780146	Zhongsheng Group Holdings Limited	China	Asia / Pacific	45150.5	44	34	47	54	84362.9	43.44	34.29	44.85	54	83845.3	42.295	33.3862	43.6678	52.5767	134839	43.54	34.3689	44.9532	54.1243	205972	45.69	36.0661	47.173	56.797	233496	44.85	39.48	42.82	55.6
1010360517	Hyundai Mobis	South Korea	Asia / Pacific	240328	75	76	80	69	268838	73.46	75	75.65	67.4	190393	73.6	74.31	75.62	70	237418	73.26	78.89	72.65	66.35	254281	73.21	78.89	72.65	66.15	232162	70.15	77.31	65.94	64.75
1067380666	Delphi Automotive PLC	United Kingdom	Europe	230146	65	68	61	67	185842	65.4	71.46	60.52	64.75	235288	68.58	72.6	68.98	62.29	225988	71.54	79.57	70.1	62.59	215954	72.63	80.14	73.09	61.39	228661	77.53	80.72	80.77	67.89
1008752057	Komatsu Ltd.	Japan	Asia / Pacific	165253	61	68	54	60	184950	65.06	72.77	55.76	65.73	265672	65.6	74.12	55.76	65.73	285772	71.51	83.56	62.15	65.33	226557	68.71	84.09	55.82	62.13	207300	68.25	78.7	61.34	61.18
1008753051	Aisin Seiki Co. Ltd.	Japan	Asia / Pacific	145260	60	71	52	57	186806	60.81	68.71	57.85	54.5	210025	60.81	68.71	57.85	54.34	161308	64.535	74.89	62.04	54.14	166515	64.39	74.89	62.04	53.94	199969	66	78.79	60.35	57.14
1032552950	Dongfeng Motor Group Co. Ltd.	China	Asia / Pacific	137525	44	38	40	62	104852	43.59	37.78	40.98	57.2	130118	44.49	37.78	41.22	57.2	116151	45.72	42.56	41.23	56.8	146302	57.33	58.22	51.98	62.15	196674	58.51	60.24	51.98	62.55
1008752568	Fuji Heavy Industries Ltd.	Japan	Asia / Pacific	292036	56	55	61.5	53	295819	57.55	58.58	56.15	57.36	261034	57.27	60.12	54.07	53.5	193449	56.97	60.89	52.75	52.4	178234	60.63	64.43	62.57	51.25	192483	63.83	65.72	68.66	52.6
1008640987	Toyota Industries Corporation	Japan	Asia / Pacific	163121	60	73	53	52	144826	63.53	75.57	59.9	52.5	171939	64.33	77.86	59.9	52.5	174780	64.86	80.03	59.62	52	172757	57.94	69.71	43.69	59	185224	56.93	67.39	45.32	56.4
1008753258	Porsche Automobil Holding SE	Germany	Europe	214631	66	66	79	51	158706	61.49	64.295	77.93	36.7	196905	59.2	58.41	77.98	36.95	219257	55.24	58.63	68.28	33.5	210167	68.95	76.58	77.51	44.95	183154	68.72	75.68	77.5	45.65
1017727368	Hotai Motor Co. Ltd	Taiwan	Asia / Pacific	90268.1	47	40	48	54	91365	45.55	40.14	45	54	101370	45.55	40.14	45	54	85840.6	57.85	57.86	54.91	62.55	167511	60.29	60	56.89	66.12	178330	60.03	62.45	56.89	61.68
1017161338	Weichai Power Co. Ltd	China	Asia / Pacific	69907.8	48	49	47	48	51686.3	47.1	49.43	43.97	47.75	80209.1	50.23	51.56	46.21	53.75	97542	50.31	51.74	46.21	53.75	136160	47.72	48.34	44.92	50.65	167008	51.94	57.33	46.71	50.65
1008752107	Peugeot S.A.	France	Europe	131735	79	77	88	71	119748	77.28	79.42	80.9	69.08	187750	80.08	80.39	83.78	75.08	213463	78.025	76.15	85.98	71.78	224480	78.21	74.5	86.495	78.53	165309	77.42	70.03	87.01	78.78
1008301909	Faurecia S.A.	France	Europe	89949.7	65	66	62	68	151081	61.07	66.43	54.57	63.95	103273	61.07	66.43	54.57	63.95	163160	66.09	79.77	55.34	64.15	146435	66.73	79.66	55.6	66.45	160902	67.83	79.15	59.4	65.45
1007902579	Advance Auto Parts Inc.	United States	North America	134996	48	41	46	59	84115.7	47.54	44.21	40.54	63.4	123780	47.04	44.93	40.54	60.4	117145	49.33	51.36	42.15	58	117208	46.42	40.93	41.49	62	159921	48.57	42.69	44.39	63.475
1007903954	BorgWarner Inc.	United States	North America	106197	63	69	59	62	129600	67.03	73.855	61.38	66.52	93486.9	68.11	75.46	63.39	66.02	109177	66.15	72.71	64.05	60.32	132352	65.85	72.71	64.05	59.12	151335	67.9	75.74	63.95	63.25
1010359580	Kia Motors Corp.	South Korea	Asia / Pacific	156915	65	67	52	74	139230	62.98	67.235	58.05	59.6	114947	60.04	61.61	58.05	59.6	116235	54.04	58.97	49.36	50.865	150349	54.85	59.4	49.36	53.23	150214	52.49	61.59	36.48	55.3
1017152947	Guangzhou Automobile Group Co., Ltd.	China	Asia / Pacific	109724	52	46	51	62	170137	46.01	37.78	45.02	62	214575	46.01	37.78	45.02	62	168816	45.91	42.56	45.02	53	155196	47.64	42.56	45.02	59.95	147043	50.195	48.585	47.11	56.8
1008585116	Astra International tbk PT	Indonesia	Asia / Pacific	193983	55	54	55	59	229814	53.33	51	52.29	58.75	256334	56.47	49.44	55.76	69.95	213460	56.47	49.44	55.76	69.95	208714	51.99	42.11	51.83	69.95	146448	52.03	43.04	51.83	68.45
1040547926	Bajaj Auto Ltd.	India	Asia / Pacific	105087	58	58	56	60	125182	57.15	58	53.31	60.25	121982	52.59	50.44	47.6	62.45	121766	52.59	50.44	47.6	62.45	77681.9	62.58	57.11	69.48	63.15	145228	62.33	59.04	69.48	59.65
1008753653	Atlantia SpA	Italy	Europe	208057	62	58	59	71	211937	69.51	65.43	66.56	79.95	238663	66.96	63.14	64.31	75.75	215255	64.77	60.76	62.16	74.55	206279	68.39	63.95	66.83	77.17	144876	72.165	63.75	75.11	79.24
1008566508	Valeo SA	France	Europe	167111	78	79	82	79	230290	76.54	79.57	72.95	77.25	124895	83.51	90.29	80.25	79.25	139049	84.24	90.86	81.16	81.95	169585	88.58	89.71	87.79	88.25	139538	89.03	90.22	87.79	89.45
1007908973	Lear Corp.	United States	North America	112353	60	47	58	81	138958	56.595	50.66	52.87	67.6	98482	63.85	72.14	53.63	67.6	106235	71.52	75.8	71.97	64.8	118625	72.1	78.31	71.97	63.6	135028	73.6	78.84	74.13	65.4
1008154035	Goodyear Tire & Rubber Co.	United States	North America	135377	73	75	75	67	136878	69.14	70.825	71.51	62.99	105187	67.49	75.57	62.72	63.79	92805.3	65.04	76.03	58.38	60.29	85334.9	64.96	75.63	58.38	59.99	133942	67.76	73.09	66.77	61.89
1008155690	Harley-Davidson, Inc.	United States	North America	171205	54	42	58	72	155509	54.31	43.5	53.11	75.19	131551	55.21	44.17	55.11	75.19	131831	54.57	44.54	57.1	69.59	146121	52.17	43.4	56.97	62.19	126890	56.58	48.8	64.88	60.82
1008156822	JB Hunt Transport Services Inc.	United States	North America	92663.1	54	55	48	62	93593.4	47.32	41.94	44.31	59.65	108913	46.08	45.59	38.66	58.65	127119	45.69	42.84	42.21	55.25	112786	43.5	36.07	42.21	55.95	125712	42.19	32.43	42.63	55.15
1008752389	Yamaha Motor Co. Ltd.	Japan	Asia / Pacific	108277	50	45	55	53	146160	48.48	48.81	45.89	51	101536	49.71	50.97	45.89	52	105422	56.31	56.75	58.74	57.2	117547	62.07	64.57	61.46	58.65	124728	61.1	60.65	61.45	61
1008243682	Penske Automotive Group, Inc.	United States	North America	96104.3	48	36	51	60	100290	47.27	36.43	48.96	59.75	94291.1	46.77	36.43	48.96	57.75	104379	48.08	36.43	48.81	63.2	96050.4	47.155	38.215	48.81	57	124235	46.44	40.54	48.81	50.9
1007914683	Westinghouse Air Brake Technologies Corporation	United States	North America	86694.3	49	40.5	50	62.5	69147.1	48.57	41.66	49.02	59	76600.6	52.57	46.28	53.41	61.45	88269.7	49.13	47.55	43.69	59.25	127314	54.055	56.01	50.71	56.59	120950	53.425	54.47	50.71	55.54
1008607634	Mazda Motor Corp.	Japan	Asia / Pacific	147905	65.5	68.5	68	56	130457	65.04	68.81	65.1	58.2	130484	65	68.81	65.1	58.03	125365	63.27	68.59	56.07	62.33	91254.5	70.61	69.44	72.08	70.97	119767	65.48	63.28	69.19	65.795
1008752405	Isuzu Motors Ltd.	Japan	Asia / Pacific	110573	50	53	52	45	134369	48.47	49.25	48.28	47.3	156619	49.93	52.58	48.28	47.13	138127	53.45	56.81	57.34	42.73	87750.9	57.16	59.285	61.91	47.63	112099	55.87	56.1	61.91	48.23
1110205108	CNH Industrial N.V.	United Kingdom	Europe	108048	82	85	84	76	100215	84.57	87.215	87.795	76.335	153939	83.275	88.9	82.22	75.17	158537	84.02	88.365	82.515	79.17	139779	85.2	88.19	83.44	82.89	110282	85.34	87.79	83.44	84.09
1008755549	Koito Manufacturing Co. Ltd.	Japan	Asia / Pacific	76521.4	55	69	48	48	86738.2	54.08	68.71	44.4	49.1	114394	53.49	64.37	47.24	47.1	93907.4	53.4	64.37	48.35	46.1	57419.4	52.86	64.37	47	46.1	109688	59.27	64.5	59.05	52.3
1007990548	AutoNation Inc.	United States	North America	76364	50	43	48	62	73872.4	48.11	41.43	44.11	63.85	58108.3	49.73	41.43	44.11	70.35	64425	50.03	42.14	44.98	68.95	82339	50.18	42.14	44.98	69.75	108835	48.22	39.34	44.59	66.45
1028235142	Motherson Sumi Systems Ltd.	India	Asia / Pacific	62365	51	47	51	55	96447.9	51.82	47.77	48.84	62.25	116476	55.04	55.77	50.8	63.5	85007.9	53.78	50.63	52.14	60.8	43029.7	53.6	50.63	52.14	60.1	103294	53.06	51.38	52.76	55.9
1008755064	Hella KGaA Hueck & Co.	Germany	Europe	54792	54	49	56	58	71849	61.88	69.86	54.81	62	84000.8	59.08	63.57	54.81	62	66695.8	59	63.57	56.07	57.3	63128.3	61.7	66.43	56.87	62.8	92864.3	67.28	71.32	68.83	59.15
1013358913	Chongqing Changan Automobile Co. Ltd.	China	Asia / Pacific	132653	46	37	47	62	102590	45.35	37.44	43.33	62	95736.9	46.1	39.11	43.33	62	62391.2	46.35	42.56	43.33	56.8	50183.9	52.01	49.22	45.9	64.35	87645.9	51.7	50.51	42.85	64.35
1016551685	Yulon Motor Co. Ltd.	Taiwan	Asia / Pacific	41037.5	56	47	61	68	43494	56.41	48.44	58.9	67.75	57544.6	56.5	48.44	55.86	68.75	71588.8	56.61	51.56	54.08	68.75	80934.4	56.93	51.8515	54.3857	69.1386	87030.8	59.71	54.3835	57.0415	72.5148
1037107109	KION GROUP AG	Germany	Europe	42535.5	48	46	44	58	57522.1	47.03	45.63	40.81	58	89353.6	53.59	45.13	56.73	62.75	84132.5	60.38	57.84	58.01	67.75	71105.3	61.48	57.84	58.01	72.15	82904	71	80.49	65.19	63.95
1008153172	Gentex Corp.	United States	North America	58270	57	52	57	64	60257.6	56.06	51.77	54.84	64	52973.8	56.06	51.31	55.46	64	73311.4	58.2	62.29	52.15	62.15	83147.7	60.35	60	55.46	68.65	82427.2	58.74	54.5	55.45	69.95
1041615709	Groupe Eurotunnel SA	France	Europe	71868.4	67	64	61.5	79	58509.8	69.455	63.27	66.28	83.2	61423.3	70.03	63.24	67.74	83.2	70845.5	70.31	67.88	67.74	77.8	84959.2	70.915	63.905	69.62	82.8	82288.7	70.915	61.22	74.54	78.7
1008759818	Hero MotoCorp Limited	India	Asia / Pacific	89139.5	53	49	48	68	99617.5	52.32	49	44.44	67.75	109018	52.32	49	44.44	67.75	74161.3	54.41	53.22	46.75	65.75	42930.2	61.91	59.56	53.82	75.85	80386.1	60.61	61.68	53.82	66.85
1008756695	Ashok Leyland Ltd.	India	Asia / Pacific	63335.5	49	49	43	59	57409.1	48.4	48.88	40.45	58.75	89641.8	49.79	54.84	38.57	58.75	66448.8	49.79	54.84	38.57	57.4	46532.9	54.82	60.38	40.74	65.65	78476.6	54.34	60.41	40.59	63.85
1008761178	Ford Otomotiv Sanayi AS	Turkey	Asia / Pacific	38514.6	63	61	62	66	65311.1	62.04	61.33	59.37	66.5	41659.5	64.29	61.78	59.37	66.5	52237	67.58	61.78	73.07	71.45	70365.4	68.95	64.56	71.28	74.05	77055.5	67.67	61.68	71.42	74.05
1007909146	Localiza Rent a Car SA	Brazil	Latin America & Caribbean	19192.7	46	34	53	53	21040.2	44.46	34.29	48.03	53	32860.7	49.68	42.86	53.57	53	44060.8	51.58	46.29	55.31	53	73100.3	52.12	46.29	55.31	55.2	74661.8	61.49	48.09	55.31	90.15
1008760968	Jiangsu Expressway Co. Ltd.	China	Asia / Pacific	62516.1	59	62	57	59	65928.7	46.27	46.06	39.9	56.75	73183.2	46.27	46.06	39.9	56.75	70319.5	46.35	40.72	46.78	53.55	75319	51.04	51.67	47.67	55.55	70290.8	51.94	54.24	47.67	55.55
1225145616	BAIC Motor Corporation Limited	China	Asia / Pacific	118543	47	39	47	62	147607	44.75	36.11	43.33	62	76977.1	44.75	36.11	43.33	62	80305.1	44.92	36.2472	43.4946	62.2355	61260.9	52.27	42.1781	50.6114	72.4188	69795.1	53.9	48.71	53.1	64.2
1021453253	Xinyi Glass Holdings Ltd.	Hong Kong	Asia / Pacific	20361	53	53	51	54	28872.7	51.58	51.58	49.6336	52.5532	40543.8	48.44	48.44	46.6121	49.354	51386.1	49.38	51.23	49.62	45.8	45622.3	57.44	67.91	52.55	50.6	66616.2	56.46	66.95	50.56	51.2
1046821452	Sinotruk (hong Kong) Ltd	China	Asia / Pacific	13684.3	43	36	43	56	13994.2	41.91	35.63	40.45	54	26787.6	43.62	37.0838	42.1004	56.2033	40747.8	49.9	42.4227	48.1617	64.2949	50182.5	49.16	41.7936	47.4474	63.3414	66483.6	48.49	49.58	44.2	53
1030899518	Minth Group Ltd.	China	Asia / Pacific	37286.5	51	50	51	54	72661.3	50.885	49.625	50.045	54	42907.3	52.485	51.1854	51.6186	55.6979	47833	51.855	51.91	51.475	48.375	71202.4	52.25	52.3054	51.8671	48.7435	62608	56.02	56.0794	55.6095	52.2605
1008239827	Autoliv, Inc.	Sweden	Europe	101837	68	65	77	57	96438	68.45	69.715	73.14	59.17	99416.6	67.24	67.43	72.8	58.09	100312	65.5	67.23	70.17	55.49	66074.5	66.74	67.23	70.09	60.69	61899.4	71.635	69.27	72.26	73.85
1008754376	Hitachi Construction Machinery Co. Ltd.	Japan	Asia / Pacific	33665.9	66.5	83	55	57	37623.5	66.58	85.07	52.73	56.35	60398.1	66.58	85.55	52.73	56.35	71019	65.75	85.55	51.87	53.45	54879.9	71.54	89.11	59.75	59.9	60108.1	72.56	88.19	59.55	65.7
1010322483	Hyundai Heavy Industries Co. Ltd.	South Korea	Asia / Pacific	53936.6	51	60	39	55	64372	49.45	58.365	35.42	54.8	72790.5	52.84	61.59	38.56	58.8	74999	53.89	61.73	41.36	59.8	77459.2	55.71	61.97	45.18	61.1	58631.3	55.96	63.34	45.18	58.6
1018853722	Cheng Shin Rubber Industries Co. Ltd.	Taiwan	Asia / Pacific	77980.9	51	40	51	65	81937.9	46.24	37.71	48.84	54	67175	46.24	37.71	48.84	54	67119	53.82	51.46	53.39	57.81	68362.5	61.56	54.66	66.86	62.73	56185.7	61.58	57.15	66.86	59.34
1014107488	CCR SA	Brazil	Latin America & Caribbean	79915	64	51	66	79	82616.2	65.53	57.31	63.04	81	100219	65.53	57.31	63.04	81	61452.8	64.64	71.59	50.26	77.9	75261.8	61.84	63.12	52.41	75.15	55903.5	62.41	67.39	52.41	71.45
1008883178	Hanon Systems Corp.	South Korea	Asia / Pacific	34632.9	64	70	57	67	45750.2	63.26	69.86	55.31	66.75	46419.2	67.6	69.86	69.03	66.75	54407.6	71.7	79.57	71.035	61.75	56409.3	73.55	79.57	73.04	65.95	53898.6	74.02	77.22	76.26	65.95
1008755267	PT United Tractors Tbk	Indonesia	Asia / Pacific	50663.7	50	41	47	67	49369.5	58.36	56.34	51.63	71	82805.9	57.76	56.34	49.91	71	86941.4	53.69	52.13	48.66	63.25	64883	55.9	55.43	51.16	64.15	52816.8	53.98	49.2	55.22	58.68
1008752867	Stanley Electric Co. Ltd.	Japan	Asia / Pacific	41947.8	60	73	54	51	52155.3	57.41	70.29	50.09	51.1	66565.8	57.41	70.29	50.09	51.1	48535.1	59.005	69.97	53.64	53	35741	59.96	71.8	53.64	53.65	52762.1	58.28	65.79	55.15	52.75
1008753662	NGK Spark Plug Co., Ltd.	Japan	Asia / Pacific	49904.6	67	81	61	54	59972.3	67.52	80.71	65.23	53.5	60499.5	67.72	80.6	65.23	53.5	48517.2	69.26	81.17	66.62	56.8	42166.6	68.99	81.055	66.62	56.2	52187.6	65.77	76.22	61.08	58.65
1008172413	Oshkosh Corporation	United States	North America	33800.4	57	52	60	60	37093.5	54.57	51.085	54.4	60.4	56488.3	63.74	56.71	70.43	64.65	53026.8	64.56	59.04	72.95	61.65	55546.6	65.02	57.51	71.53	67.95	50938.3	63.65	59.64	66.15	66.55
1008584129	Toyoda Gosei Co. Ltd.	Japan	Asia / Pacific	32079.9	63	71	65	49	42549.1	64.14	74.43	63.36	51	41917.4	66.14	80.14	63.36	51	38945.7	60.77	78.43	51.23	51.05	37682.4	60.925	78.43	51.16	50.8	49371.1	64.69	75.7	60.62	55.7
1017708543	Bosch Ltd	India	Asia / Pacific	105512	61	73	51	60	100092	59.52	70.2	49.51	60.6	101176	59.12	69.06	49.51	60.6	82176.6	60.3	69.51	53.49	58.3	68277.8	59.89	70.09	49.29	62.6	49154.6	59.19	68.37	49.29	62.2
1008186545	Thor Industries Inc.	United States	North America	30354.2	53	43	52	73	38846.4	52.39	43.49	48.57	73	60604.4	48.8	35.51	51.42	71.5	50095.8	48.43	35.51	51.42	68.1	33465.6	48.25	35.51	51.42	67.4	47638	48.11	35.74	51.42	66.4
1008258402	Brilliance China Automotive Holdings Ltd.	Hong Kong	Asia / Pacific	73073	45	33	48	62	56013.6	46.72	39.44	44.88	62	109180	46.72	39.44	44.88	62	82016.1	47.67	44.22	44.88	57.2	53766.4	51.945	49.89	48.355	59.95	46646.2	54.76	51.23	53.73	62.35
1008758932	Toyota Boshoku Corporation	Japan	Asia / Pacific	43527.4	65.5	79	63	50	52014.1	63.04	75.43	60.66	49.5	51881.6	63.04	69.29	64.6	51.2	43166.3	63.33	69.29	65.71	51.2	37710.6	57.35	62.7472	59.5053	46.3654	46248.7	60.06	65.7123	62.3171	48.5563
1008752295	Nifco Inc.	Japan	Asia / Pacific	34857.7	56	58	52	58	35634.5	53.36	54.29	49.64	58	43120.9	50.89	51.2	49.64	52.45	33816	50.89	51.2	49.64	52.45	27403.8	50.87	51.2	50.71	50.65	45869.9	56.72	65.68	52.67	50.65
1007908921	Landstar System Inc.	United States	North America	28513.7	61	59	63	62	29070.3	59.88	59.14	59.21	62	38219.4	59.88	59.14	59.21	62	45181.8	59.66	59.14	56.22	65.9	43363	62	59.14	61.9	65.9	45309.6	63.88	65.34	61.9	65
1008754652	Linamar Corp.	Canada	North America	38679.2	60	57	55	73	48403.6	55.6	58.2	50.58	60	39958.7	57.59	65.51	52.72	53	39296.5	59.58	65.63	57.47	54.5	44901	59.3	65.63	57.27	53.7	45082.8	61.22	63.86	61.54	57
1010324003	USS Co. Ltd.	Japan	Asia / Pacific	42217.3	44	37	43	57	42428.2	45.04	37.71	41.66	60.7	50021.5	45.04	37.71	41.66	60.7	48543.7	45.9	42.29	43.49	54.8	48611.2	46.17	42.29	43.49	55.9	44075.8	45.47	39.48	43.87	56.4
1008288464	Hino Motors Ltd.	Japan	Asia / Pacific	69217.8	58	62	57	53	61050.1	56.2	62.23	51.97	52.45	70085.7	57.37	63.31	53.05	56.15	64181.6	54.52	65.18	43.22	53.25	52327.1	54.52	65.18	43.22	53.25	42524.1	60.6	73.72	50.32	53.95
1013382397	HYUNDAI WIA Corp.	South Korea	Asia / Pacific	32719.9	53	49	50	64	37702.8	52.72	48.91	48.84	64.25	29329.8	51.22	48.91	51.42	54.1	30560.3	49.72	46.11	50.755	53.1	39061.1	48.22	44.7189	49.2238	51.498	39691.7	53.61	49.7176	54.726	57.2544
1008754406	Mitsubishi Motors Corp.	Japan	Asia / Pacific	80866	48	50	42	54	59962.5	47.53	59.67	37.37	37.9	103758	52.56	60.64	50.24	38.9	104935	52.385	59.5	51.71	39.55	73671.2	50.92	58.81	52.02	35.4	39047.2	52.32	56.91	52.02	44.6
1008756823	Shenzhen International Holdings Ltd.	Hong Kong	Asia / Pacific	28846.7	44	34	45	54	30197.4	41.5	34.29	40	54	35118	42.15	34.8271	40.6265	54.8458	41848.6	47	38.8345	45.3012	61.1566	43657.6	48.78	40.3052	47.0169	63.4728	38548.9	48.82	40.93	50.13	57.8
1008760719	Nokian Renkaat Oyj	Finland	Europe	40516.6	85	95	80	79	48592.5	80.42	93.49	69.56	79.5	58588.7	85.16	94.06	78.18	84.2	54425.1	79.08	87.2	76.59	71.7	42705.3	83.94	88.34	86.42	73.8	38475.1	84.53	85.84	88.25	76.75
1008761566	Weifu High-Technology Co. Ltd.	China	Asia / Pacific	37961.4	45	38	51	45	32684.6	43.99	37.71	48.84	45	36499	46.72	40.0503	51.871	47.7927	26528.5	50.54	43.3249	56.1122	51.7004	28862.5	47.76	40.9418	53.0257	48.8566	37384	46.23	41.43	49.62	47.5
1008755078	Sixt Societas Europaea	Germany	Europe	19777.3	47	45	48	48	24135.6	45.45	44.85	44.25	48.2	29802.8	37.39	30.24	36.71	48.5	45797.3	42.11	40.47	40.37	47.2	42491	42.11	40.47	40.37	47.4	36315	41.06	36.25	40.67	48.4
1008755449	Bucher Industries AG	Switzerland	Europe	23097.2	53	44	46	76	24132.2	53.44	47.84	43.46	76.34	34703.2	57.55	50.69	48.59	81.09	35186.5	54.5	50.69	48.59	68.89	33237.5	53.2	50.69	51.22	59.99	35936.4	52.49	47.64	51.22	62.05
1008755004	Compagnie Plastic Omnium	France	Europe	39265.9	61	60	56	70	48259	60.96	62.43	54.01	70	58244.2	62.6	64.71	59.91	63.95	58021.5	62.6	64.71	59.91	63.95	39986.7	61.77	62.43	59.84	63.95	35049.3	72.11	78.53	69.21	67.75
1008123753	Visteon Corp.	United States	North America	31145.9	70	68	65	78	42847.1	69.7	70.43	63.57	78.5	21476.8	69.7	70.43	63.57	78.5	28065.2	67.94	69.17	66.41	68.65	38425.7	70.1	67.8	71.76	70.65	34645.5	65.49	63.3413	67.0408	66.0038
1008756424	TOFAS Turk Otomobil Fabrikasi A.S.	Turkey	Asia / Pacific	49155.3	62	56	67	65	58909.8	60.9	59.67	51.19	74.75	26253.5	60.9	59.67	51.19	74.75	29221.6	67.36	69.44	63.33	68.45	31821.6	60.3	62.162	56.6924	61.2758	34251.1	64.74	66.7391	60.8667	65.7876
1008754313	TransForce Inc.	Canada	North America	20596.8	51	41	50	67	18563.6	49.45	41.43	45.49	67	21777.3	50.7	47.14	45.49	64	26897	49.25	45	45.49	61.2	26049.1	48.02	42.14	45.49	60.3	34094.6	48.44	43.32	45.49	60.3
1008760315	Zhejiang Expressway Co. Ltd.	China	Asia / Pacific	52771.7	44	38	45	49	44059.6	41.53	37.94	40	49	53442.9	51.41	51.95	50.72	51.75	40273.3	51.41	51.95	50.72	51.75	42976.4	50.7	47.08	50.73	55.75	32835.4	52.54	54.525	50.095	54.75
1008756882	CSSC Offshore & Marine Engineering (Group) Company Limited	China	Asia / Pacific	66198.3	51	50	47	59	42737.5	50.59	51.16	44.11	58.75	45192.4	50.59	51.16	44.11	58.75	22190.9	45.05	45.5576	39.2796	52.3164	23357.2	49.92	50.4825	43.5258	57.9719	32548.4	53.42	54.0219	46.5775	62.0365
1212918510	Hankook Tire Co., Ltd.	South Korea	Asia / Pacific	43852.1	70	75	62	71	53380.5	75.88	75	78.62	72.75	57649.3	84.99	90.29	84.26	78.75	52575.5	88.29	90.86	89.81	83.5	39199.4	87.03	90.86	86.66	82.24	30745.6	86.85	94.1	89.04	73.2
1012027582	Samsung Heavy Industries Ltd.	South Korea	Asia / Pacific	24951.7	64	63	68	61	15960	63.62	63.405	65.27	60.5	33297.4	59.95	62.34	58.05	60.5	35266.1	57.81	62.39	51.44	59.4	42871.3	53.48	59.8	41.71	59.8	29808	51.38	55.7	42.63	56.7
1008757699	Jungheinrich AG	Germany	Europe	22687.6	49	40	52	58	30758.6	47.99	40.03	49.93	58	40186.4	47.99	40.03	49.93	58	38888.9	53.04	50.69	52.16	58.05	28443.1	51.06	45.22	50.37	61.35	29443.8	55.83	57.19	54.2	55.95
1012388230	Shenzhen Expressway Co., Ltd.	China	Asia / Pacific	24137.1	53	52	50	61	25258.8	41.5	34.29	40	54	26883.6	42.15	34.8271	40.6265	54.8458	25543.5	47	38.8345	45.3012	61.1566	30760	48.78	40.3052	47.0169	63.4728	27427.9	48.82	40.93	50.13	57.8
1041652937	Yangzijiang Shipbuilding Holdings Ltd.	China	Asia / Pacific	33162.9	43	40	41	50	24313.2	46.41	48.5	40.03	52	36959.8	47.1	50.82	40.03	51	34771.9	47.75	52.53	40.22	50.6	37258.9	50.04	52.53	41.76	57.6	27149.9	46.82	46.97	41.76	53.64
1008756733	Bharat Forge Ltd.	India	Asia / Pacific	37628.9	50	43	56	48	29050.4	51.87	49.51	54.01	51.75	41094.9	53.26	53.37	53.39	53.75	42961.7	53.87	54.51	53.16	54.1	30198.7	54.68	54.51	55.75	53.2	26730.5	52.91	59.09	51.2	47
1010360423	Korea Express Co. Ltd.	South Korea	Asia / Pacific	26526	57	51	65	52	28339.5	55.35	54.29	53.22	60.25	23610.4	48.76	42.86	45.18	62.75	24893.7	56.8	48.57	59.84	63.45	25453.2	55.47	48.57	56.52	63.45	25915.9	57.51	53.18	54.52	68.35
1008582385	Sumitomo Rubber Industries Ltd.	Japan	Asia / Pacific	39044.8	63	78	58	51	39846.9	63.08	72.71	61.28	52.5	46282.8	60.15	75	52.24	51.6	40651	58.575	72.03	51.76	50.4	32568.7	58.64	72.03	51.76	50.9	25837.1	57.6	68.62	53.15	49.3
1008754564	Seino Holdings Co., Ltd.	Japan	Asia / Pacific	21099.7	56	56	58	53	21119	51.29	53.57	53.22	45	26504.4	51.29	53.57	53.22	45	32442.8	46.3	47.86	45.18	45.9	27406	46.3	47.86	45.18	45.9	25615.8	47.01	49.89	45.18	45.9
1008754386	NHK Spring Co. Ltd.	Japan	Asia / Pacific	28515.9	62	67	65	51	31795.7	59.31	65.71	58.59	51.5	30530.7	59.31	65.71	58.59	51.5	28658	64.14	69.06	66.24	53.9	21886.1	64.14	69.06	66.24	53.9	24629.3	68.16	73.3884	70.3916	57.2782
1014135046	ComfortDelGro Corporation Limited	Singapore	Asia / Pacific	47190.6	51	46	51	58	42230.7	51.17	46.91	50.74	57.8	36715.3	50.76	43.17	50.12	62.4	34792.5	52.4	50.8	50.62	57.5	39653.5	52.93	50.8	50.62	59.6	24483.2	57.05	52.74	55.1	66.2
1008752872	Yokohama Rubber Co. Ltd.	Japan	Asia / Pacific	29595.1	67	74	67	57	26029.6	67.78	71.91	65.46	65.69	33359.9	63.47	68.26	62.06	59	34792	62.9	75.855	56.68	54.3	31886.5	62.8	76.14	56.68	53.9	24022.9	73.84	89.57	69.53	58.7
1008187702	Trinity Industries Inc.	United States	North America	43276.2	55	58	40	72	32997.4	53.97	57.33	37.25	72	44923.3	53.97	57.33	37.25	72	47303.1	53.22	57.5	40.26	64.5	26574.2	52.42	57.5	41.33	61.3	23823.6	45.84	37.62	42.4	63.8
1007912202	Ryder System, Inc.	United States	North America	43852.8	56	48	59	65	35415.2	59.36	57.29	57.8	64.75	40693.6	57.09	57.07	54.33	63.75	36581.5	56.26	60.78	49.18	61.25	29425.7	55.465	60.78	45.22	60.65	22825.3	53.91	59.27	43.99	60.55
1013752976	TS TECH Co., Ltd.	Japan	Asia / Pacific	16297.6	75	80	79	61	18581.4	73.96	79.57	77.3	60.75	27366.6	64.57	76.71	61.95	51.75	19697	65.04	79.57	60.08	52.65	16549.6	58.29	71.312	53.8448	47.1859	20730.9	68.48	83.7785	63.2577	55.4347
1021512260	Pt Jasa Marga (Persero) Tbk	Indonesia	Asia / Pacific	28080.9	55	47	52	69	25996.4	52.91	46.63	48.04	69.5	30012.4	52.91	46.63	48.04	69.5	23089.1	61.55	41.78	73.14	70.69	28934.8	60.48	44.32	68.24	70.69	20252.4	60.5	45.81	68.24	68.69
1007904514	Avis Budget Group, Inc.	United States	North America	50231.3	51	42	49	65	29088.3	48.73	42.14	44.44	64.8	28492	54.37	48	53.42	64.8	29037	54.06	47.7263	53.1154	64.4305	23677.6	47.32	41.776	46.4932	56.3976	19559.1	49.41	43.6211	48.5467	58.8885
1008756290	Fukuyama Transporting Co., Ltd.	Japan	Asia / Pacific	12292.1	58	45	71	55	13456	51.53	44.57	59.21	49	16531.2	51.53	44.57	59.21	49	22328.6	47.88	45	47.55	52.45	19025.1	44.58	41.8985	44.2727	48.835	19452.6	44.91	42.2086	44.6005	49.1965
1008753770	NOK Corp.	Japan	Asia / Pacific	49588.1	66	77	62	55	32407.7	63.16	80.71	56.34	49.5	39547.2	61.56	76.14	56.34	49.5	31796.1	61.91	75.91	58.54	47.7	25694.2	61.91	75.91	58.54	47.7	19264.5	61.36	75.2356	58.0199	47.2762
1015763652	Piaggio & C. SpA	Italy	Europe	13274.4	58	51	63	66	16776.6	59.25	54.44	61.05	65.75	14608.5	59.25	54.44	61.05	65.75	17988.7	57.76	53.071	59.5147	64.0965	19776.4	58	53.2915	59.762	64.3629	19016.5	56.11	51.5549	57.8146	62.2655
1008012509	National Express Group Plc	United Kingdom	Europe	22087.4	60	60	57	66	23499.8	58.76	59.72	53.14	66.4	24568.7	60.06	62.18	54.73	66.7	26262.7	59.7	60.725	55.34	63.65	28257.2	61.42	64.11	55.34	67.4	17547.1	63.61	64.03	60.57	67.9
1011046610	Martinrea International Inc.	Canada	North America	10896.9	60	63	57	59	16251.4	58.91	63	55.44	58.75	12257.2	52.74	48.34	46.92	58.75	16700	50.26	48.34	46.92	58.3	17597.8	50.26	48.34	46.93	58.3	17215.4	57.39	55.81	51.96	68.3
1013564939	Mekonomen AB	Sweden	Europe	8673	54	41	53	75	8608.33	53.47	41.14	50.94	74.75	10666.5	67.155	59	65.935	80.525	11850.6	63.02	53	63.33	76.55	11970.5	62.74	53	63.32	75.45	15151.5	68.89	58.69	75.09	73.25
1020664999	Halfords Group plc	United Kingdom	Europe	11938.4	71	60	84	67	10144.7	73.8	67.71	83.54	66.75	10706.4	73.8	62.43	83.54	66.75	7213.33	58.4	47.29	64.55	64.14	8893.74	58.2	47.128	64.3289	63.9203	15018.4	59.77	48.3994	66.0643	65.6447
1008753973	UMW Holdings Bhd	Malaysia	Asia / Pacific	26077	52	43	52	66	21851.4	51.8	45	49.96	66.25	22333.6	51.415	43.72	49.96	67.15	19196.5	57.33	51.56	49.97	76.55	16195.5	57.76	51.56	50.49	77.65	15006.1	57.99	54.83	50.49	72.65
1008186228	Terex Corp.	United States	North America	24418.5	53	55	42	65	26406.1	50.87	53.55	37.71	64.98	35575.5	52.84	53.78	41.99	66.49	29460.3	54.13	54.99	47.73	61.69	20945.5	49.78	46.2	47.24	59.05	14999.1	48.9	45.3833	46.4049	58.0061
1015543666	EcoRodovias Infraestrutura e Logistica SA	Brazil	Latin America & Caribbean	12960.8	67	61	66	78	12413.4	66.15	61.43	63.04	77.75	17400.7	66.15	61.43	63.04	77.75	12735.5	71.07	65.9989	67.7287	83.5328	16619.7	67.96	63.1109	64.7649	79.8774	14324.1	72.87	67.6705	69.4441	85.6484
1016152731	Construcciones & Auxiliar de Ferrocarriles SA	Spain	Europe	10145.3	55	46	58	63	12041.3	53.87	46.47	55.97	62.75	14280.8	53.87	46.47	55.97	62.75	15164.3	58.65	50.5934	60.9363	68.3179	15864.9	63.625	54.885	66.1053	74.113	13230.9	67.47	58.2018	70.1002	78.5918
1013525773	Super Retail Group Ltd.	Australia	Asia / Pacific	13732.1	63	47	70	75	14059.1	76.03	66.57	90.09	66.75	13049	77.96	71.71	90.09	71.45	11422.2	77.35	76	79.27	76.15	11942.1	75.805	73.715	74.29	80.25	13221.8	74.02	68.71	72.31	84.19
1008757225	Hyundai Mipo Dockyard Co. Ltd.	South Korea	Asia / Pacific	10853.8	53	43	56	64	11231.4	52.95	42.19	52.72	70.5	14681.4	52.95	42.19	52.72	70.5	18057.1	40.33	38.94	38.57	45	17982.3	44.27	42.7442	42.3381	49.3962	12443.9	43.54	42.0394	41.6399	48.5817
1008755693	ARB Corporation Limited	Australia	Asia / Pacific	7771.51	49	46	52	48	9910.06	48.63	46.17	50.09	49.75	9963.8	48.63	46.17	50.09	47.9	11207.2	49.44	49.03	50.09	49	9794.99	50.52	49.14	51.43	51	12253.6	53.69	57.12	50.09	54.65
1017672439	Nan Kang Rubber Tire Co. Ltd.	Taiwan	Asia / Pacific	7965.75	52	47	51	59	7119.34	50.78	46.77	48.84	59.5	7270.75	50.78	46.77	48.84	59.5	6713.22	49.17	45.2871	47.2915	57.6135	9939.33	49.17	45.2871	47.2915	57.6135	11388.5	62.11	57.2053	59.7371	72.7756
1008757767	Firstgroup plc	United Kingdom	Europe	18364.6	65	59	70	65	16701.4	65.53	60.57	70.47	64.58	19346.1	67.3	65.43	68.06	69.48	14392	64.84	58.78	66.61	70.38	17805.1	67.21	65.56	66.61	70.48	10285.4	62.34	60.53	59.9	68.78
1008000190	Kongsberg Automotive Holding ASA	Norway	Europe	5176.65	66	50	73	75	8917.49	73.54	61.86	82.85	75	7031.38	73.88	68.71	82.85	69.75	7452.36	75.06	71.57	81.44	69.75	8903.07	74.51	71.57	81.44	67.55	7825.6	75.82	73.94	77.38	75.95
1008757799	Vossloh AG	Germany	Europe	8305.27	50	53	45	54	9331.98	49.88	52.6	43.82	54	10394.5	49.88	52.6	43.82	54	7952.26	54.22	57.1767	47.6327	58.6985	7163.29	60.7	64.01	53.3255	65.7137	7602.03	64.46	67.9751	56.6287	69.7843
1008758380	Mullen Group Ltd.	Canada	North America	12802.5	58	56	56	64	12161.9	55.93	55.75	50.38	64	13302.6	54.87	50.16	50.47	64.3	11618.6	53.525	47.58	52.27	64.2	8004.95	52.18	45	51.02	64.1	6276.59	51.97	46.61	51.02	61
1007997907	Go-Ahead Group plc	United Kingdom	Europe	15824.4	74	84	68	70	13272.2	71.44	84	61.51	69.75	10190.1	61.25	65.57	52.16	69.75	9357.43	59.03	65.57	47.42	66.45	11341.4	58.25	69	45.52	63.55	5941.17	60.62	73.39	50.13	59.55
1008753552	Haldex AB	Sweden	Europe	6039.02	49	43	44	67	5108.51	47.86	42.06	40.81	67	4103.86	47.01	42.06	40.81	63.6	3688.33	58.22	52.0896	50.5415	78.766	4122.92	56.78	50.8013	49.2915	76.8179	4376.58	56.17	50.2555	48.7619	75.9926
